# Supplementary material
Source: publisher figshare collection journal article supplement (https://acs.figshare.com/ndownloader/files/4185409)
Supplement: Supplementary file 1 [file 4185409]

 
data_1
#====================================================================

# 1. SUBMISSION DETAILS

_publ_contact_author          # Name and address of author for correspondence
;
 Hong Deng
 School of Chemistry and Environment
 South China Nomal University 
 Guangzhou 510006
 P. R. China
;
_publ_contact_author_phone  '86 20 33381880'
_publ_contact_author_fax    '86 20 33381880'
_publ_contact_author_email  'dh@scnu.edu.cn'
_publ_requested_joiurnal    'Cryst. Growth Des.'
_publ_requested_coeditor_name ?
_publ_contact_letter
;
Dear Sir or Madam:
Please consider this CIF as supplmentary data for a manuscript
submitted to Cryst. Growth Des.

Deng Hong
;
#=================================================================

# 2. PROCESSING SUMMARY (IUCr Office Use Only)

_journal_date_recd_electronic     ?

_journal_date_to_coeditor         ?
_journal_date_from_coeditor       ?
_journal_date_accepted            ?

_journal_date_printers_first      ?
_journal_date_printers_final      ?
_journal_date_proofs_out          ?
_journal_date_proofs_in           ?

_journal_coeditor_name            ?
_journal_coeditor_code            ?
_journal_coeditor_notes
 ?

_journal_techeditor_code          ?
_journal_techeditor_notes
 ?

_journal_coden_ASTM               ?
_journal_name_full                ?
_journal_year                     ?
_journal_volume                   ?
_journal_issue                    ?
_journal_page_first               ?
_journal_page_last                ?

_journal_suppl_publ_number        ?
_journal_suppl_publ_pages         ?

#=======================================================

# 3. TITLE AND AUTHOR LIST

_publ_section_title
;
?
;

loop_
 _publ_author_name
 _publ_author_address
 'Hong Deng'
; School of Chemistry and Environment 
South China Normal University
Guangzhou 510006
P.R. China
;
 
#============================================================ 
 
_audit_creation_method            SHELXL-97 
_chemical_name_systematic 
; 
 ? 
; 
_chemical_name_common             ? 
_chemical_melting_point           ? 
_chemical_formula_moiety          'C16 H16 Cu Eu N8 O8' 
_chemical_formula_sum 
 'C16 H16 Cu Eu N8 O8' 
_chemical_formula_weight          663.89 
 
loop_ 
 _atom_type_symbol 
 _atom_type_description 
 _atom_type_scat_dispersion_real 
 _atom_type_scat_dispersion_imag 
 _atom_type_scat_source 
 'C'  'C'   0.0033   0.0016 
 'International Tables Vol C Tables 4.2.6.8 and 6.1.1.4' 
 'H'  'H'   0.0000   0.0000 
 'International Tables Vol C Tables 4.2.6.8 and 6.1.1.4' 
 'Cu'  'Cu'   0.3201   1.2651 
 'International Tables Vol C Tables 4.2.6.8 and 6.1.1.4' 
 'Eu'  'Eu'  -0.1578   3.6682 
 'International Tables Vol C Tables 4.2.6.8 and 6.1.1.4' 
 'N'  'N'   0.0061   0.0033 
 'International Tables Vol C Tables 4.2.6.8 and 6.1.1.4' 
 'O'  'O'   0.0106   0.0060 
 'International Tables Vol C Tables 4.2.6.8 and 6.1.1.4' 
 
_symmetry_cell_setting            monoclinic 
_symmetry_space_group_name_H-M    'C 2/c' 
_symmetry_space_group_name_Hall   '-C 2yc'
 
loop_ 
 _symmetry_equiv_pos_as_xyz 
 'x, y, z' 
 '-x, y, -z+1/2' 
 'x+1/2, y+1/2, z' 
 '-x+1/2, y+1/2, -z+1/2' 
 '-x, -y, -z' 
 'x, -y, z-1/2' 
 '-x+1/2, -y+1/2, -z' 
 'x+1/2, -y+1/2, z-1/2' 
 
_cell_length_a                    15.991(10) 
_cell_length_b                    15.206(10) 
_cell_length_c                    9.272(6) 
_cell_angle_alpha                 90.00 
_cell_angle_beta                  115.343(7) 
_cell_angle_gamma                 90.00 
_cell_volume                      2038(2) 
_cell_formula_units_Z             4
_cell_measurement_temperature     296(2) 
_cell_measurement_reflns_used     1840 
_cell_measurement_theta_min       1.94 
_cell_measurement_theta_max       25.20 
 
_exptl_crystal_description        block 
_exptl_crystal_colour             yellow 
_exptl_crystal_size_max           0.28 
_exptl_crystal_size_mid           0.25 
_exptl_crystal_size_min           0.25 
_exptl_crystal_density_meas       ? 
_exptl_crystal_density_diffrn     2.164 
_exptl_crystal_density_method     'not measured' 
_exptl_crystal_F_000              1296 
_exptl_absorpt_coefficient_mu     4.159
_exptl_absorpt_correction_type    multi-scan 
_exptl_absorpt_correction_T_min   0.3888 
_exptl_absorpt_correction_T_max   0.4228 
_exptl_absorpt_process_details    'Apex2 (Bruker, 2005)' 
 
_exptl_special_details 
; 
 ? 
; 
 
_diffrn_ambient_temperature       296(2) 
_diffrn_radiation_wavelength      0.71073 
_diffrn_radiation_type            MoK\a 
_diffrn_radiation_source          'fine-focus sealed tube' 
_diffrn_radiation_monochromator   graphite 
_diffrn_measurement_device_type   'Bruker AXS SMART APEX CCD diffractometer'  
_diffrn_measurement_method        '\w scans' 
_diffrn_detector_area_resol_mean  ? 
_diffrn_standards_number          0 
_diffrn_standards_interval_count  ? 
_diffrn_standards_interval_time   ? 
_diffrn_standards_decay_%         ? 
_diffrn_reflns_number             4810 
_diffrn_reflns_av_R_equivalents   0.0182 
_diffrn_reflns_av_sigmaI/netI     0.0229 
_diffrn_reflns_limit_h_min        -19 
_diffrn_reflns_limit_h_max        19 
_diffrn_reflns_limit_k_min        -10 
_diffrn_reflns_limit_k_max        18 
_diffrn_reflns_limit_l_min        -10 
_diffrn_reflns_limit_l_max        11 
_diffrn_reflns_theta_min          1.94 
_diffrn_reflns_theta_max          25.20 
_reflns_number_total              1840 
_reflns_number_gt                 1751 
_reflns_threshold_expression      >2sigma(I) 
 
_computing_data_collection        'Apex2 (Bruker, 2005)' 
_computing_cell_refinement        'Apex2 (Bruker, 2005)' 
_computing_data_reduction         'Apex2 (Bruker, 2005)' 
_computing_structure_solution     'SHELXL 6.12 (Bruker, 2000-2003)' 
_computing_structure_refinement   'SHELXL 6.12'  
_computing_molecular_graphics     'SHELXL 6.12'  
_computing_publication_material   'SHELXL 6.12'  
 
_refine_special_details 
; 
 Refinement of F^2^ against ALL reflections.  The weighted R-factor wR and 
 goodness of fit S are based on F^2^, conventional R-factors R are based 
 on F, with F set to zero for negative F^2^. The threshold expression of 
 F^2^ > 2sigma(F^2^) is used only for calculating R-factors(gt) etc. and is 
 not relevant to the choice of reflections for refinement.  R-factors based 
 on F^2^ are statistically about twice as large as those based on F, and R- 
 factors based on ALL data will be even larger. 
; 
 
_refine_ls_structure_factor_coef  Fsqd  
_refine_ls_matrix_type            full 
_refine_ls_weighting_scheme       calc  
_refine_ls_weighting_details 
 'calc w=1/[\s^2^(Fo^2^)+(0.0216P)^2^+12.3542P] where P=(Fo^2^+2Fc^2^)/3' 
_atom_sites_solution_primary      direct 
_atom_sites_solution_secondary    difmap 
_atom_sites_solution_hydrogens    geom 
_refine_ls_hydrogen_treatment     constr 
_refine_ls_extinction_method      none 
_refine_ls_extinction_coef        ? 
_refine_ls_number_reflns          1840 
_refine_ls_number_parameters      156 
_refine_ls_number_restraints      0 
_refine_ls_R_factor_all           0.0233 
_refine_ls_R_factor_gt            0.0216 
_refine_ls_wR_factor_ref          0.0528 
_refine_ls_wR_factor_gt           0.0521 
_refine_ls_goodness_of_fit_ref    1.001 
_refine_ls_restrained_S_all       1.001 
_refine_ls_shift/su_max           0.001 
_refine_ls_shift/su_mean          0.000 
 
loop_ 
 _atom_site_label 
 _atom_site_type_symbol 
 _atom_site_fract_x 
 _atom_site_fract_y 
 _atom_site_fract_z 
 _atom_site_U_iso_or_equiv 
 _atom_site_adp_type 
 _atom_site_occupancy 
 _atom_site_symmetry_multiplicity 
 _atom_site_calc_flag 
 _atom_site_refinement_flags 
 _atom_site_disorder_assembly 
 _atom_site_disorder_group 
C1 C 0.1698(2) 0.1646(2) 0.5630(4) 0.0204(7) Uani 1 1 d . . . 
C2 C 0.1353(2) 0.1733(2) 0.3887(4) 0.0204(7) Uani 1 1 d . . . 
C3 C 0.1270(3) 0.0985(3) 0.2970(4) 0.0278(8) Uani 1 1 d . . . 
H2 H 0.1408 0.0436 0.3458 0.033 Uiso 1 1 calc R . . 
C4 C 0.0984(3) 0.1050(3) 0.1335(5) 0.0323(9) Uani 1 1 d . . . 
H3 H 0.0928 0.0548 0.0728 0.039 Uiso 1 1 calc R . . 
C5 C 0.0783(3) 0.1868(2) 0.0615(4) 0.0241(8) Uani 1 1 d . . . 
H4 H 0.0602 0.1916 -0.0478 0.029 Uiso 1 1 calc R . . 
C6 C 0.0849(2) 0.2622(2) 0.1512(4) 0.0180(7) Uani 1 1 d . . . 
C7 C 0.1127(2) 0.2550(2) 0.3142(4) 0.0195(7) Uani 1 1 d . . . 
H1 H 0.1164 0.3051 0.3742 0.023 Uiso 1 1 calc R . . 
C8 C 0.0626(2) 0.3495(2) 0.0685(4) 0.0189(7) Uani 1 1 d . . . 
Cu2 Cu 0.2500 0.2500 1.0000 0.03610(19) Uani 1 2 d S . . 
Eu1 Eu 0.0000 0.531117(16) 0.2500 0.01628(9) Uani 1 2 d S . . 
N1 N 0.2143(2) 0.0925(2) 0.6423(3) 0.0239(7) Uani 1 1 d . . . 
N2 N 0.2373(2) 0.1096(2) 0.7951(4) 0.0259(7) Uani 1 1 d . . . 
N3 N 0.2077(2) 0.1889(2) 0.8064(4) 0.0263(7) Uani 1 1 d . . . 
N4 N 0.1645(2) 0.2258(2) 0.6614(3) 0.0249(7) Uani 1 1 d . . . 
O3 O 0.04627(18) 0.41525(16) 0.1352(3) 0.0246(6) Uani 1 1 d . . . 
O4 O 0.06140(18) 0.35236(16) -0.0676(3) 0.0252(6) Uani 1 1 d . . . 
O1W O 0.12612(18) 0.59603(17) 0.2007(3) 0.0273(6) Uani 1 1 d . . . 
H1A H 0.1314 0.6493 0.1969 0.041 Uiso 1 1 d R . . 
H1B H 0.1415 0.5709 0.1384 0.041 Uiso 1 1 d R . . 
O2W O 0.15619(17) 0.48519(16) 0.4613(3) 0.0223(5) Uani 1 1 d . . . 
H2A H 0.1879 0.4609 0.4232 0.033 Uiso 1 1 d R . . 
H2B H 0.1814 0.5290 0.5116 0.033 Uiso 1 1 d R . . 
 
loop_ 
 _atom_site_aniso_label 
 _atom_site_aniso_U_11 
 _atom_site_aniso_U_22 
 _atom_site_aniso_U_33 
 _atom_site_aniso_U_23 
 _atom_site_aniso_U_13 
 _atom_site_aniso_U_12 
C1 0.0203(17) 0.0207(18) 0.0189(18) 0.0016(15) 0.0072(14) 0.0005(15) 
C2 0.0232(18) 0.0222(19) 0.0155(17) 0.0042(14) 0.0079(14) 0.0029(15) 
C3 0.038(2) 0.0179(19) 0.025(2) 0.0042(16) 0.0115(17) 0.0039(17) 
C4 0.053(3) 0.018(2) 0.025(2) -0.0034(16) 0.0146(19) 0.0036(18) 
C5 0.034(2) 0.0226(19) 0.0162(17) 0.0008(15) 0.0111(15) 0.0031(17) 
C6 0.0193(17) 0.0184(18) 0.0162(17) 0.0027(14) 0.0075(14) 0.0014(14) 
C7 0.0205(18) 0.0213(18) 0.0185(18) -0.0001(14) 0.0101(15) 0.0010(15) 
C8 0.0172(16) 0.0210(19) 0.0164(17) 0.0019(14) 0.0051(14) -0.0001(14) 
Cu2 0.0477(4) 0.0382(4) 0.0191(4) -0.0043(3) 0.0111(3) 0.0011(4) 
Eu1 0.02177(14) 0.01399(13) 0.01288(13) 0.000 0.00722(10) 0.000 
N1 0.0315(17) 0.0223(16) 0.0148(15) 0.0033(12) 0.0069(13) 0.0019(14) 
N2 0.0311(17) 0.0258(17) 0.0178(16) 0.0046(13) 0.0077(13) 0.0015(14) 
N3 0.0296(17) 0.0278(18) 0.0202(16) 0.0012(14) 0.0094(13) 0.0032(14) 
N4 0.0294(17) 0.0259(17) 0.0177(16) 0.0049(13) 0.0086(13) 0.0058(14) 
O3 0.0304(14) 0.0184(13) 0.0241(13) -0.0009(11) 0.0108(11) 0.0055(11) 
O4 0.0377(15) 0.0220(13) 0.0165(13) 0.0052(10) 0.0122(11) 0.0036(12) 
O1W 0.0380(15) 0.0214(13) 0.0293(14) -0.0027(11) 0.0209(12) -0.0048(12) 
O2W 0.0244(13) 0.0221(14) 0.0194(13) -0.0026(10) 0.0084(11) 0.0011(11) 
 
_geom_special_details 
; 
 All esds (except the esd in the dihedral angle between two l.s. planes) 
 are estimated using the full covariance matrix.  The cell esds are taken 
 into account individually in the estimation of esds in distances, angles 
 and torsion angles; correlations between esds in cell parameters are only 
 used when they are defined by crystal symmetry.  An approximate (isotropic) 
 treatment of cell esds is used for estimating esds involving l.s. planes. 
; 
 
loop_ 
 _geom_bond_atom_site_label_1 
 _geom_bond_atom_site_label_2 
 _geom_bond_distance 
 _geom_bond_site_symmetry_2 
 _geom_bond_publ_flag 
C1 N4 1.330(5) . ? 
C1 N1 1.343(5) . ? 
C1 C2 1.473(5) . ? 
C2 C3 1.392(5) . ? 
C2 C7 1.393(5) . ? 
C3 C4 1.387(5) . ? 
C3 H2 0.9300 . ? 
C4 C5 1.383(5) . ? 
C4 H3 0.9300 . ? 
C5 C6 1.393(5) . ? 
C5 H4 0.9300 . ? 
C6 C7 1.384(5) . ? 
C6 C8 1.499(5) . ? 
C7 H1 0.9300 . ? 
C8 O4 1.255(4) . ? 
C8 O3 1.260(4) . ? 
C8 Eu1 3.238(4) 5_565 ? 
Cu2 N3 1.872(3) 7_557 ? 
Cu2 N3 1.872(3) . ? 
Eu1 O3 2.337(3) . ? 
Eu1 O3 2.337(3) 2 ? 
Eu1 O4 2.354(3) 6_566 ? 
Eu1 O4 2.354(3) 5_565 ? 
Eu1 O1W 2.458(3) 2 ? 
Eu1 O1W 2.458(3) . ? 
Eu1 O2W 2.525(3) 2 ? 
Eu1 O2W 2.525(3) . ? 
Eu1 C8 3.238(4) 6_566 ? 
Eu1 C8 3.238(4) 5_565 ? 
N1 N2 1.328(4) . ? 
N2 N3 1.316(5) . ? 
N3 N4 1.343(4) . ? 
O4 Eu1 2.354(3) 5_565 ? 
O1W H1A 0.8168 . ? 
O1W H1B 0.8131 . ? 
O2W H2A 0.8200 . ? 
O2W H2B 0.8146 . ? 
 
loop_ 
 _geom_angle_atom_site_label_1 
 _geom_angle_atom_site_label_2 
 _geom_angle_atom_site_label_3 
 _geom_angle 
 _geom_angle_site_symmetry_1 
 _geom_angle_site_symmetry_3 
 _geom_angle_publ_flag 
N4 C1 N1 111.7(3) . . ? 
N4 C1 C2 125.9(3) . . ? 
N1 C1 C2 122.4(3) . . ? 
C3 C2 C7 119.3(3) . . ? 
C3 C2 C1 119.4(3) . . ? 
C7 C2 C1 121.3(3) . . ? 
C2 C3 C4 120.6(4) . . ? 
C2 C3 H2 119.7 . . ? 
C4 C3 H2 119.7 . . ? 
C5 C4 C3 119.5(4) . . ? 
C5 C4 H3 120.3 . . ? 
C3 C4 H3 120.3 . . ? 
C4 C5 C6 120.6(3) . . ? 
C4 C5 H4 119.7 . . ? 
C6 C5 H4 119.7 . . ? 
C5 C6 C7 119.6(3) . . ? 
C5 C6 C8 118.9(3) . . ? 
C7 C6 C8 121.5(3) . . ? 
C2 C7 C6 120.4(3) . . ? 
C2 C7 H1 119.8 . . ? 
C6 C7 H1 119.8 . . ? 
O4 C8 O3 123.3(3) . . ? 
O4 C8 C6 116.3(3) . . ? 
O3 C8 C6 120.4(3) . . ? 
O4 C8 Eu1 36.66(17) . 5_565 ? 
O3 C8 Eu1 87.4(2) . 5_565 ? 
C6 C8 Eu1 151.2(2) . 5_565 ? 
N3 Cu2 N3 180.000(1) 7_557 . ? 
O3 Eu1 O3 82.12(14) . 2 ? 
O3 Eu1 O4 141.15(9) . 6_566 ? 
O3 Eu1 O4 110.87(10) 2 6_566 ? 
O3 Eu1 O4 110.87(10) . 5_565 ? 
O3 Eu1 O4 141.15(9) 2 5_565 ? 
O4 Eu1 O4 82.36(13) 6_566 5_565 ? 
O3 Eu1 O1W 146.38(9) . 2 ? 
O3 Eu1 O1W 76.88(10) 2 2 ? 
O4 Eu1 O1W 71.78(10) 6_566 2 ? 
O4 Eu1 O1W 73.03(9) 5_565 2 ? 
O3 Eu1 O1W 76.88(10) . . ? 
O3 Eu1 O1W 146.38(9) 2 . ? 
O4 Eu1 O1W 73.03(9) 6_566 . ? 
O4 Eu1 O1W 71.78(10) 5_565 . ? 
O1W Eu1 O1W 132.63(13) 2 . ? 
O3 Eu1 O2W 80.73(9) . 2 ? 
O3 Eu1 O2W 75.16(9) 2 2 ? 
O4 Eu1 O2W 137.34(9) 6_566 2 ? 
O4 Eu1 O2W 71.40(9) 5_565 2 ? 
O1W Eu1 O2W 68.73(9) 2 2 ? 
O1W Eu1 O2W 125.80(9) . 2 ? 
O3 Eu1 O2W 75.16(9) . . ? 
O3 Eu1 O2W 80.73(9) 2 . ? 
O4 Eu1 O2W 71.40(9) 6_566 . ? 
O4 Eu1 O2W 137.34(9) 5_565 . ? 
O1W Eu1 O2W 125.80(9) 2 . ? 
O1W Eu1 O2W 68.73(9) . . ? 
O2W Eu1 O2W 147.89(11) 2 . ? 
O3 Eu1 C8 143.48(9) . 6_566 ? 
O3 Eu1 C8 92.38(10) 2 6_566 ? 
O4 Eu1 C8 18.56(9) 6_566 6_566 ? 
O4 Eu1 C8 95.99(10) 5_565 6_566 ? 
O1W Eu1 C8 64.10(9) 2 6_566 ? 
O1W Eu1 C8 89.23(9) . 6_566 ? 
O2W Eu1 C8 132.80(8) 2 6_566 ? 
O2W Eu1 C8 68.32(9) . 6_566 ? 
O3 Eu1 C8 92.38(10) . 5_565 ? 
O3 Eu1 C8 143.48(9) 2 5_565 ? 
O4 Eu1 C8 95.99(10) 6_566 5_565 ? 
O4 Eu1 C8 18.56(9) 5_565 5_565 ? 
O1W Eu1 C8 89.23(9) 2 5_565 ? 
O1W Eu1 C8 64.10(9) . 5_565 ? 
O2W Eu1 C8 68.32(9) 2 5_565 ? 
O2W Eu1 C8 132.80(8) . 5_565 ? 
C8 Eu1 C8 111.83(14) 6_566 5_565 ? 
N2 N1 C1 105.3(3) . . ? 
N3 N2 N1 108.6(3) . . ? 
N2 N3 N4 110.6(3) . . ? 
N2 N3 Cu2 122.5(2) . . ? 
N4 N3 Cu2 124.9(3) . . ? 
C1 N4 N3 103.8(3) . . ? 
C8 O3 Eu1 173.9(2) . . ? 
C8 O4 Eu1 124.8(2) . 5_565 ? 
Eu1 O1W H1A 121.0 . . ? 
Eu1 O1W H1B 117.7 . . ? 
H1A O1W H1B 111.5 . . ? 
Eu1 O2W H2A 112.3 . . ? 
Eu1 O2W H2B 107.5 . . ? 
H2A O2W H2B 111.7 . . ? 
 
_diffrn_measured_fraction_theta_max    1.000 
_diffrn_reflns_theta_full              25.20 
_diffrn_measured_fraction_theta_full   1.000 
_refine_diff_density_max    0.608 
_refine_diff_density_min   -0.891 
_refine_diff_density_rms    0.094 

 
data_2
#====================================================================

# 1. SUBMISSION DETAILS

_publ_contact_author          # Name and address of author for correspondence
;
 Hong Deng
 School of Chemistry and Environment
 South China Nomal University 
 Guangzhou 510006
 P. R. China
;
_publ_contact_author_phone  '86 20 33381880'
_publ_contact_author_fax    '86 20 33381880'
_publ_contact_author_email  'dh@scnu.edu.cn'
_publ_requested_joiurnal    'Cryst. Growth Des.'
_publ_requested_coeditor_name ?
_publ_contact_letter
;
Dear Sir or Madam:
Please consider this CIF as supplmentary data for a manuscript
submitted to Cryst. Growth Des.

Deng Hong
;
#=================================================================

# 2. PROCESSING SUMMARY (IUCr Office Use Only)

_journal_date_recd_electronic     ?

_journal_date_to_coeditor         ?
_journal_date_from_coeditor       ?
_journal_date_accepted            ?

_journal_date_printers_first      ?
_journal_date_printers_final      ?
_journal_date_proofs_out          ?
_journal_date_proofs_in           ?

_journal_coeditor_name            ?
_journal_coeditor_code            ?
_journal_coeditor_notes
 ?

_journal_techeditor_code          ?
_journal_techeditor_notes
 ?

_journal_coden_ASTM               ?
_journal_name_full                ?
_journal_year                     ?
_journal_volume                   ?
_journal_issue                    ?
_journal_page_first               ?
_journal_page_last                ?

_journal_suppl_publ_number        ?
_journal_suppl_publ_pages         ?

#=======================================================

# 3. TITLE AND AUTHOR LIST

_publ_section_title
;
?
;

loop_
 _publ_author_name
 _publ_author_address
 'Hong Deng'
; School of Chemistry and Environment 
South China Normal University
Guangzhou 510006
P.R. China
;
 
#============================================================ 
 
_audit_creation_method            SHELXL-97 
_chemical_name_systematic 
; 
 ? 
; 
_chemical_name_common             ? 
_chemical_melting_point           ? 
_chemical_formula_moiety          'C16 H16 Cu Gd N8 O8' 
_chemical_formula_sum 
 'C16 H16 Cu Gd N8 O8' 
_chemical_formula_weight          669.17
 
loop_ 
 _atom_type_symbol 
 _atom_type_description 
 _atom_type_scat_dispersion_real 
 _atom_type_scat_dispersion_imag 
 _atom_type_scat_source 
 'C'  'C'   0.0033   0.0016 
 'International Tables Vol C Tables 4.2.6.8 and 6.1.1.4' 
 'H'  'H'   0.0000   0.0000 
 'International Tables Vol C Tables 4.2.6.8 and 6.1.1.4' 
 'Cu'  'Cu'   0.3201   1.2651 
 'International Tables Vol C Tables 4.2.6.8 and 6.1.1.4' 
 'Gd'  'Gd'  -0.1653   3.9035 
 'International Tables Vol C Tables 4.2.6.8 and 6.1.1.4' 
 'N'  'N'   0.0061   0.0033 
 'International Tables Vol C Tables 4.2.6.8 and 6.1.1.4' 
 'O'  'O'   0.0106   0.0060 
 'International Tables Vol C Tables 4.2.6.8 and 6.1.1.4' 
 
_symmetry_cell_setting            monoclinic  
_symmetry_space_group_name_H-M    'C 2/c' 
_symmetry_space_group_name_Hall   '-C 2yc'
 
loop_ 
 _symmetry_equiv_pos_as_xyz 
 'x, y, z' 
 '-x, y, -z+1/2' 
 'x+1/2, y+1/2, z' 
 '-x+1/2, y+1/2, -z+1/2' 
 '-x, -y, -z' 
 'x, -y, z-1/2' 
 '-x+1/2, -y+1/2, -z' 
 'x+1/2, -y+1/2, z-1/2' 
 
_cell_length_a                    16.0425(19) 
_cell_length_b                    15.1600(18) 
_cell_length_c                    9.2883(11) 
_cell_angle_alpha                 90.00 
_cell_angle_beta                  115.3890(10) 
_cell_angle_gamma                 90.00 
_cell_volume                      2040.8(4) 
_cell_formula_units_Z             4 
_cell_measurement_temperature     296(2) 
_cell_measurement_reflns_used     1839 
_cell_measurement_theta_min       1.94 
_cell_measurement_theta_max       25.19 
 
_exptl_crystal_description        block 
_exptl_crystal_colour             yellow  
_exptl_crystal_size_max           0.30 
_exptl_crystal_size_mid           0.28 
_exptl_crystal_size_min           0.25 
_exptl_crystal_density_meas       ? 
_exptl_crystal_density_diffrn     2.178 
_exptl_crystal_density_method     'not measured' 
_exptl_crystal_F_000              1300.0 
_exptl_absorpt_coefficient_mu     4.330  
_exptl_absorpt_correction_type    multi-scan  
_exptl_absorpt_correction_T_min   0.3567 
_exptl_absorpt_correction_T_max   0.4109 
_exptl_absorpt_process_details    multi-scan  
 
_exptl_special_details 
; 
 ? 
; 
 
_diffrn_ambient_temperature       296(2) 
_diffrn_radiation_wavelength      0.71073 
_diffrn_radiation_type            MoK\a 
_diffrn_radiation_source          'fine-focus sealed tube' 
_diffrn_radiation_monochromator   graphite 
_diffrn_measurement_device_type   'Bruker AXS SMART APEX CCD diffractometer'  
_diffrn_measurement_method        '\w scans' 
_diffrn_detector_area_resol_mean  ? 
_diffrn_standards_number          0 
_diffrn_standards_interval_count  ? 
_diffrn_standards_interval_time   ? 
_diffrn_standards_decay_%         ? 
_diffrn_reflns_number             5088 
_diffrn_reflns_av_R_equivalents   0.0240 
_diffrn_reflns_av_sigmaI/netI     0.0267 
_diffrn_reflns_limit_h_min        -19 
_diffrn_reflns_limit_h_max        19 
_diffrn_reflns_limit_k_min        -18 
_diffrn_reflns_limit_k_max        17 
_diffrn_reflns_limit_l_min        -11 
_diffrn_reflns_limit_l_max        7 
_diffrn_reflns_theta_min          1.94 
_diffrn_reflns_theta_max          25.19 
_reflns_number_total              1839 
_reflns_number_gt                 1755 
_reflns_threshold_expression      >2sigma(I) 
 
_computing_data_collection        'Apex2 (Bruker, 2005)'  
_computing_cell_refinement        'Apex2 (Bruker, 2005)'  
_computing_data_reduction         'Apex2 (Bruker, 2005)'  
_computing_structure_solution     'SHELXL 6.12 (Bruker, 2000-2003)'  
_computing_structure_refinement   'SHELXL 6.12' 
_computing_molecular_graphics     'SHELXL 6.12' 
_computing_publication_material   'SHELXL 6.12' 
 
_refine_special_details 
; 
 Refinement of F^2^ against ALL reflections.  The weighted R-factor wR and 
 goodness of fit S are based on F^2^, conventional R-factors R are based 
 on F, with F set to zero for negative F^2^. The threshold expression of 
 F^2^ > 2sigma(F^2^) is used only for calculating R-factors(gt) etc. and is 
 not relevant to the choice of reflections for refinement.  R-factors based 
 on F^2^ are statistically about twice as large as those based on F, and R- 
 factors based on ALL data will be even larger. 
; 
 
_refine_ls_structure_factor_coef  Fsqd  
_refine_ls_matrix_type            full 
_refine_ls_weighting_scheme       calc  
_refine_ls_weighting_details 
 'calc w=1/[\s^2^(Fo^2^)+(0.0279P)^2^+18.4179P] where P=(Fo^2^+2Fc^2^)/3' 
_atom_sites_solution_primary      direct 
_atom_sites_solution_secondary    difmap 
_atom_sites_solution_hydrogens    geom 
_refine_ls_hydrogen_treatment     constr 
_refine_ls_extinction_method      none 
_refine_ls_extinction_coef        ? 
_refine_ls_number_reflns          1839 
_refine_ls_number_parameters      160 
_refine_ls_number_restraints      0 
_refine_ls_R_factor_all           0.0273 
_refine_ls_R_factor_gt            0.0260 
_refine_ls_wR_factor_ref          0.0691 
_refine_ls_wR_factor_gt           0.0685 
_refine_ls_goodness_of_fit_ref    1.066 
_refine_ls_restrained_S_all       1.066 
_refine_ls_shift/su_max           0.008 
_refine_ls_shift/su_mean          0.001 
 
loop_ 
 _atom_site_label 
 _atom_site_type_symbol 
 _atom_site_fract_x 
 _atom_site_fract_y 
 _atom_site_fract_z 
 _atom_site_U_iso_or_equiv 
 _atom_site_adp_type 
 _atom_site_occupancy 
 _atom_site_symmetry_multiplicity 
 _atom_site_calc_flag 
 _atom_site_refinement_flags 
 _atom_site_disorder_assembly 
 _atom_site_disorder_group 
C1 C 0.0846(3) 0.2625(3) 0.1516(5) 0.0201(9) Uani 1 1 d . . . 
C2 C 0.1126(3) 0.2553(3) 0.3150(5) 0.0204(9) Uani 1 1 d . . . 
H2 H 0.1159 0.3054 0.3750 0.019(12) Uiso 1 1 calc R . . 
C3 C 0.1356(3) 0.1735(3) 0.3890(5) 0.0217(9) Uani 1 1 d . . . 
C4 C 0.1277(4) 0.0984(3) 0.2974(6) 0.0311(11) Uani 1 1 d . . . 
H4 H 0.1420 0.0434 0.3461 0.020(12) Uiso 1 1 calc R . . 
C5 C 0.0985(4) 0.1053(3) 0.1341(6) 0.0340(12) Uani 1 1 d . . . 
H5 H 0.0927 0.0548 0.0736 0.041(16) Uiso 1 1 calc R . . 
C6 C 0.0780(3) 0.1873(3) 0.0605(5) 0.0260(10) Uani 1 1 d . . . 
H6 H 0.0599 0.1920 -0.0487 0.026(13) Uiso 1 1 calc R . . 
C7 C 0.1704(3) 0.1642(3) 0.5637(5) 0.0228(9) Uani 1 1 d . . . 
C8 C 0.0621(3) 0.3497(3) 0.0687(5) 0.0207(9) Uani 1 1 d . . . 
Cu1 Cu 0.2500 0.2500 1.0000 0.0404(3) Uani 1 2 d S . . 
Gd1 Gd 0.0000 0.531184(19) 0.2500 0.01757(12) Uani 1 2 d S . . 
N1 N 0.1647(3) 0.2254(3) 0.6617(5) 0.0277(9) Uani 1 1 d . . . 
N2 N 0.2080(3) 0.1889(3) 0.8071(5) 0.0279(9) Uani 1 1 d . . . 
N3 N 0.2378(3) 0.1093(3) 0.7958(5) 0.0291(9) Uani 1 1 d . . . 
N4 N 0.2148(3) 0.0927(3) 0.6425(5) 0.0262(9) Uani 1 1 d . . . 
O3 O 0.0460(2) 0.4154(2) 0.1354(4) 0.0264(7) Uani 1 1 d . . . 
O4 O 0.0607(2) 0.3532(2) -0.0677(4) 0.0274(7) Uani 1 1 d . . . 
O1W O -0.1259(2) 0.5956(2) 0.2980(4) 0.0285(7) Uani 1 1 d . . . 
H1A H -0.1383 0.5715 0.3660 0.043 Uiso 1 1 d R . . 
H1B H -0.1400 0.6480 0.2910 0.043 Uiso 1 1 d R . . 
O2W O 0.1551(2) 0.4847(2) 0.4609(4) 0.0246(7) Uani 1 1 d . . . 
H2A H 0.1836 0.4716 0.4094 0.037 Uiso 1 1 d R . . 
H2B H 0.1819 0.5223 0.5279 0.037 Uiso 1 1 d R . . 
 
loop_ 
 _atom_site_aniso_label 
 _atom_site_aniso_U_11 
 _atom_site_aniso_U_22 
 _atom_site_aniso_U_33 
 _atom_site_aniso_U_23 
 _atom_site_aniso_U_13 
 _atom_site_aniso_U_12 
C1 0.023(2) 0.017(2) 0.024(2) 0.0031(18) 0.0139(19) 0.0025(17) 
C2 0.022(2) 0.020(2) 0.022(2) -0.0007(18) 0.0121(18) 0.0008(18) 
C3 0.026(2) 0.021(2) 0.021(2) 0.0056(18) 0.0136(19) 0.0038(18) 
C4 0.043(3) 0.015(2) 0.035(3) 0.005(2) 0.017(2) 0.004(2) 
C5 0.054(3) 0.019(3) 0.030(3) -0.003(2) 0.018(2) 0.004(2) 
C6 0.039(3) 0.022(2) 0.021(2) 0.0000(19) 0.016(2) 0.004(2) 
C7 0.027(2) 0.020(2) 0.024(2) 0.0033(18) 0.0129(19) 0.0016(18) 
C8 0.025(2) 0.018(2) 0.021(2) 0.0020(18) 0.0111(18) 0.0012(18) 
Cu1 0.0564(6) 0.0387(5) 0.0265(5) -0.0043(4) 0.0180(4) 0.0016(5) 
Gd1 0.02687(18) 0.01172(17) 0.01716(17) 0.000 0.01233(13) 0.000 
N1 0.033(2) 0.028(2) 0.023(2) 0.0044(17) 0.0130(18) 0.0066(17) 
N2 0.036(2) 0.028(2) 0.023(2) 0.0020(17) 0.0151(17) 0.0032(18) 
N3 0.040(2) 0.022(2) 0.026(2) 0.0034(17) 0.0147(18) 0.0023(18) 
N4 0.037(2) 0.021(2) 0.0211(19) 0.0051(16) 0.0128(17) 0.0035(17) 
O3 0.0390(19) 0.0155(16) 0.0276(17) -0.0020(13) 0.0171(15) 0.0043(14) 
O4 0.043(2) 0.0219(17) 0.0211(16) 0.0022(13) 0.0171(15) 0.0010(14) 
O1W 0.041(2) 0.0223(17) 0.0319(18) 0.0021(14) 0.0254(16) 0.0041(15) 
O2W 0.0309(17) 0.0233(17) 0.0223(16) -0.0031(13) 0.0139(14) -0.0004(14) 
 
_geom_special_details 
; 
 All esds (except the esd in the dihedral angle between two l.s. planes) 
 are estimated using the full covariance matrix.  The cell esds are taken 
 into account individually in the estimation of esds in distances, angles 
 and torsion angles; correlations between esds in cell parameters are only 
 used when they are defined by crystal symmetry.  An approximate (isotropic) 
 treatment of cell esds is used for estimating esds involving l.s. planes. 
; 
 
loop_ 
 _geom_bond_atom_site_label_1 
 _geom_bond_atom_site_label_2 
 _geom_bond_distance 
 _geom_bond_site_symmetry_2 
 _geom_bond_publ_flag 
C1 C6 1.397(6) . ? 
C1 C2 1.391(6) . ? 
C1 C8 1.494(6) . ? 
C2 C3 1.389(6) . ? 
C2 H2 0.9300 . ? 
C3 C4 1.393(7) . ? 
C3 C7 1.479(6) . ? 
C4 C5 1.386(7) . ? 
C4 H4 0.9300 . ? 
C5 C6 1.388(7) . ? 
C5 H5 0.9300 . ? 
C6 H6 0.9300 . ? 
C7 N1 1.330(6) . ? 
C7 N4 1.332(6) . ? 
C8 O3 1.257(5) . ? 
C8 O4 1.259(5) . ? 
Cu1 N2 1.867(4) 7_557 ? 
Cu1 N2 1.867(4) . ? 
Gd1 O3 2.330(3) . ? 
Gd1 O3 2.330(3) 2 ? 
Gd1 O4 2.340(3) 6_566 ? 
Gd1 O4 2.340(3) 5_565 ? 
Gd1 O1W 2.450(3) 2 ? 
Gd1 O1W 2.450(3) . ? 
Gd1 O2W 2.519(3) 2 ? 
Gd1 O2W 2.519(3) . ? 
N1 N2 1.346(5) . ? 
N2 N3 1.319(6) . ? 
N3 N4 1.333(6) . ? 
O4 Gd1 2.340(3) 5_565 ? 
O1W H1A 0.8235 . ? 
O1W H1B 0.8211 . ? 
O2W H2A 0.8158 . ? 
O2W H2B 0.8165 . ? 
 
loop_ 
 _geom_angle_atom_site_label_1 
 _geom_angle_atom_site_label_2 
 _geom_angle_atom_site_label_3 
 _geom_angle 
 _geom_angle_site_symmetry_1 
 _geom_angle_site_symmetry_3 
 _geom_angle_publ_flag 
C6 C1 C2 120.2(4) . . ? 
C6 C1 C8 118.2(4) . . ? 
C2 C1 C8 121.7(4) . . ? 
C3 C2 C1 120.2(4) . . ? 
C3 C2 H2 119.9 . . ? 
C1 C2 H2 119.9 . . ? 
C2 C3 C4 119.5(4) . . ? 
C2 C3 C7 121.5(4) . . ? 
C4 C3 C7 119.0(4) . . ? 
C5 C4 C3 120.4(4) . . ? 
C5 C4 H4 119.8 . . ? 
C3 C4 H4 119.8 . . ? 
C4 C5 C6 120.3(5) . . ? 
C4 C5 H5 119.9 . . ? 
C6 C5 H5 119.9 . . ? 
C5 C6 C1 119.5(4) . . ? 
C5 C6 H6 120.3 . . ? 
C1 C6 H6 120.3 . . ? 
N1 C7 N4 111.7(4) . . ? 
N1 C7 C3 125.5(4) . . ? 
N4 C7 C3 122.8(4) . . ? 
O3 C8 O4 123.0(4) . . ? 
O3 C8 C1 120.2(4) . . ? 
O4 C8 C1 116.8(4) . . ? 
N2 Cu1 N2 180.000(1) 7_557 . ? 
O3 Gd1 O3 82.25(16) . 2 ? 
O3 Gd1 O4 141.23(12) . 6_566 ? 
O3 Gd1 O4 110.43(11) 2 6_566 ? 
O3 Gd1 O4 110.43(11) . 5_565 ? 
O3 Gd1 O4 141.23(12) 2 5_565 ? 
O4 Gd1 O4 82.95(16) 6_566 5_565 ? 
O3 Gd1 O1W 76.70(11) . 2 ? 
O3 Gd1 O1W 146.12(12) 2 2 ? 
O4 Gd1 O1W 73.33(11) 6_566 2 ? 
O4 Gd1 O1W 71.92(12) 5_565 2 ? 
O3 Gd1 O1W 146.12(12) . . ? 
O3 Gd1 O1W 76.70(11) 2 . ? 
O4 Gd1 O1W 71.92(12) 6_566 . ? 
O4 Gd1 O1W 73.33(11) 5_565 . ? 
O1W Gd1 O1W 133.04(16) 2 . ? 
O3 Gd1 O2W 80.50(11) . 2 ? 
O3 Gd1 O2W 75.16(11) 2 2 ? 
O4 Gd1 O2W 137.57(11) 6_566 2 ? 
O4 Gd1 O2W 71.38(11) 5_565 2 ? 
O1W Gd1 O2W 125.90(11) 2 2 ? 
O1W Gd1 O2W 68.68(11) . 2 ? 
O3 Gd1 O2W 75.16(11) . . ? 
O3 Gd1 O2W 80.50(11) 2 . ? 
O4 Gd1 O2W 71.38(11) 6_566 . ? 
O4 Gd1 O2W 137.57(11) 5_565 . ? 
O1W Gd1 O2W 68.68(11) 2 . ? 
O1W Gd1 O2W 125.90(11) . . ? 
O2W Gd1 O2W 147.54(14) 2 . ? 
C7 N1 N2 104.0(4) . . ? 
N3 N2 N1 110.2(4) . . ? 
N3 N2 Cu1 122.5(3) . . ? 
N1 N2 Cu1 125.3(3) . . ? 
N2 N3 N4 108.4(4) . . ? 
N3 N4 C7 105.7(4) . . ? 
C8 O3 Gd1 173.8(3) . . ? 
C8 O4 Gd1 125.6(3) . 5_565 ? 
Gd1 O1W H1A 116.8 . . ? 
Gd1 O1W H1B 126.3 . . ? 
H1A O1W H1B 109.9 . . ? 
Gd1 O2W H2A 103.2 . . ? 
Gd1 O2W H2B 114.8 . . ? 
H2A O2W H2B 112.0 . . ? 
 
_diffrn_measured_fraction_theta_max    0.998 
_diffrn_reflns_theta_full              25.19 
_diffrn_measured_fraction_theta_full   0.998 
_refine_diff_density_max    1.120 
_refine_diff_density_min   -1.381 
_refine_diff_density_rms    0.124 

 
data_3
#====================================================================

# 1. SUBMISSION DETAILS

_publ_contact_author          # Name and address of author for correspondence
;
 Hong Deng
 School of Chemistry and Environment
 South China Nomal University 
 Guangzhou 510006
 P. R. China
;
_publ_contact_author_phone  '86 20 33381880'
_publ_contact_author_fax    '86 20 33381880'
_publ_contact_author_email  'dh@scnu.edu.cn'
_publ_requested_joiurnal    'Cryst. Growth Des.'
_publ_requested_coeditor_name ?
_publ_contact_letter
;
Dear Sir or Madam:
Please consider this CIF as supplmentary data for a manuscript
submitted to Cryst. Growth Des.
Deng Hong
;
#=================================================================

# 2. PROCESSING SUMMARY (IUCr Office Use Only)

_journal_date_recd_electronic     ?

_journal_date_to_coeditor         ?
_journal_date_from_coeditor       ?
_journal_date_accepted            ?

_journal_date_printers_first      ?
_journal_date_printers_final      ?
_journal_date_proofs_out          ?
_journal_date_proofs_in           ?

_journal_coeditor_name            ?
_journal_coeditor_code            ?
_journal_coeditor_notes
 ?

_journal_techeditor_code          ?
_journal_techeditor_notes
 ?

_journal_coden_ASTM               ?
_journal_name_full                ?
_journal_year                     ?
_journal_volume                   ?
_journal_issue                    ?
_journal_page_first               ?
_journal_page_last                ?

_journal_suppl_publ_number        ?
_journal_suppl_publ_pages         ?

#=======================================================

# 3. TITLE AND AUTHOR LIST

_publ_section_title
;
?
;

loop_
 _publ_author_name
 _publ_author_address
 'Hong Deng'
; School of Chemistry and Environment 
South China Normal University
Guangzhou 510006
P.R. China
;
 
#============================================================ 
  
 
_audit_creation_method            SHELXL-97 
_chemical_name_systematic 
; 
 ? 
; 
_chemical_name_common             ? 
_chemical_melting_point           ? 
_chemical_formula_moiety          'C16 H16 Cu N8 O8 Tb' 
_chemical_formula_sum 
 'C16 H16 Cu N8 O8 Tb'  
_chemical_formula_weight          670.85
 
loop_ 
 _atom_type_symbol 
 _atom_type_description 
 _atom_type_scat_dispersion_real 
 _atom_type_scat_dispersion_imag 
 _atom_type_scat_source 
 'C'  'C'   0.0033   0.0016 
 'International Tables Vol C Tables 4.2.6.8 and 6.1.1.4' 
 'H'  'H'   0.0000   0.0000 
 'International Tables Vol C Tables 4.2.6.8 and 6.1.1.4' 
 'Cu'  'Cu'   0.3201   1.2651 
 'International Tables Vol C Tables 4.2.6.8 and 6.1.1.4' 
 'N'  'N'   0.0061   0.0033 
 'International Tables Vol C Tables 4.2.6.8 and 6.1.1.4' 
 'O'  'O'   0.0106   0.0060 
 'International Tables Vol C Tables 4.2.6.8 and 6.1.1.4' 
 'Tb'  'Tb'  -0.1723   4.1537 
 'International Tables Vol C Tables 4.2.6.8 and 6.1.1.4' 
 
_symmetry_cell_setting            monoclinic 
_symmetry_space_group_name_H-M    'C 2/c' 
_symmetry_space_group_name_Hall   '-C 2yc'
 
loop_ 
 _symmetry_equiv_pos_as_xyz 
 'x, y, z' 
 '-x, y, -z+1/2' 
 'x+1/2, y+1/2, z' 
 '-x+1/2, y+1/2, -z+1/2' 
 '-x, -y, -z' 
 'x, -y, z-1/2' 
 '-x+1/2, -y+1/2, -z' 
 'x+1/2, -y+1/2, z-1/2' 
 
_cell_length_a                    16.033(3) 
_cell_length_b                    15.155(2) 
_cell_length_c                    9.2818(15) 
_cell_angle_alpha                 90.00 
_cell_angle_beta                  115.391(2) 
_cell_angle_gamma                 90.00 
_cell_volume                      2037.4(6) 
_cell_formula_units_Z             4
_cell_measurement_temperature     296(2) 
_cell_measurement_reflns_used     1834 
_cell_measurement_theta_min       1.94
_cell_measurement_theta_max       25.19  
 
_exptl_crystal_description        block 
_exptl_crystal_colour             yellow
_exptl_crystal_size_max           0.30 
_exptl_crystal_size_mid           0.30 
_exptl_crystal_size_min           0.28 
_exptl_crystal_density_meas       ? 
_exptl_crystal_density_diffrn     2.187 
_exptl_crystal_density_method     'not measured' 
_exptl_crystal_F_000              1304.0 
_exptl_absorpt_coefficient_mu     4.553 
_exptl_absorpt_correction_type    multi-scan 
_exptl_absorpt_correction_T_min   0.3422 
_exptl_absorpt_correction_T_max   0.3622 
_exptl_absorpt_process_details    'Apex2 (Bruker, 2005)' 
 
_exptl_special_details 
; 
 ? 
; 
 
_diffrn_ambient_temperature       296(2) 
_diffrn_radiation_wavelength      0.71073 
_diffrn_radiation_type            MoK\a 
_diffrn_radiation_source          'fine-focus sealed tube' 
_diffrn_radiation_monochromator   graphite 
_diffrn_measurement_device_type   'Bruker AXS SMART APEX CCD diffractometer'   
_diffrn_measurement_method        '\w scans' 
_diffrn_detector_area_resol_mean  ? 
_diffrn_standards_number          0 
_diffrn_standards_interval_count  ? 
_diffrn_standards_interval_time   ? 
_diffrn_standards_decay_%         ? 
_diffrn_reflns_number             4973 
_diffrn_reflns_av_R_equivalents   0.0172 
_diffrn_reflns_av_sigmaI/netI     0.0200 
_diffrn_reflns_limit_h_min        -19 
_diffrn_reflns_limit_h_max        19 
_diffrn_reflns_limit_k_min        -18 
_diffrn_reflns_limit_k_max        9 
_diffrn_reflns_limit_l_min        -11 
_diffrn_reflns_limit_l_max        11 
_diffrn_reflns_theta_min          1.94 
_diffrn_reflns_theta_max          25.19 
_reflns_number_total              1834 
_reflns_number_gt                 1743 
_reflns_threshold_expression      >2sigma(I) 
 
_computing_data_collection        'Apex2 (Bruker, 2005)'  
_computing_cell_refinement        'Apex2 (Bruker, 2005)'  
_computing_data_reduction         'Apex2 (Bruker, 2005)'  
_computing_structure_solution     'SHELXL 6.12 (Bruker, 2000-2003)' 
_computing_structure_refinement   'SHELXL 6.12' 
_computing_molecular_graphics     'SHELXL 6.12'
_computing_publication_material   'SHELXL 6.12' 
 
_refine_special_details 
; 
 Refinement of F^2^ against ALL reflections.  The weighted R-factor wR and 
 goodness of fit S are based on F^2^, conventional R-factors R are based 
 on F, with F set to zero for negative F^2^. The threshold expression of 
 F^2^ > 2sigma(F^2^) is used only for calculating R-factors(gt) etc. and is 
 not relevant to the choice of reflections for refinement.  R-factors based 
 on F^2^ are statistically about twice as large as those based on F, and R- 
 factors based on ALL data will be even larger. 
; 
 
_refine_ls_structure_factor_coef  Fsqd  
_refine_ls_matrix_type            full 
_refine_ls_weighting_scheme       calc  
_refine_ls_weighting_details 
 'calc w=1/[\s^2^(Fo^2^)+(0.0215P)^2^+16.8386P] where P=(Fo^2^+2Fc^2^)/3' 
_atom_sites_solution_primary      direct 
_atom_sites_solution_secondary    difmap 
_atom_sites_solution_hydrogens    geom 
_refine_ls_hydrogen_treatment     constr 
_refine_ls_extinction_method      none 
_refine_ls_extinction_coef        ? 
_refine_ls_number_reflns          1834 
_refine_ls_number_parameters      156 
_refine_ls_number_restraints      0 
_refine_ls_R_factor_all           0.0232 
_refine_ls_R_factor_gt            0.0218 
_refine_ls_wR_factor_ref          0.0556 
_refine_ls_wR_factor_gt           0.0550 
_refine_ls_goodness_of_fit_ref    1.023 
_refine_ls_restrained_S_all       1.023 
_refine_ls_shift/su_max           0.002 
_refine_ls_shift/su_mean          0.000 
 
loop_ 
 _atom_site_label 
 _atom_site_type_symbol 
 _atom_site_fract_x 
 _atom_site_fract_y 
 _atom_site_fract_z 
 _atom_site_U_iso_or_equiv 
 _atom_site_adp_type 
 _atom_site_occupancy 
 _atom_site_symmetry_multiplicity 
 _atom_site_calc_flag 
 _atom_site_refinement_flags 
 _atom_site_disorder_assembly 
 _atom_site_disorder_group 
C1 C 0.4387(3) 0.3506(2) 0.4319(4) 0.0195(8) Uani 1 1 d . . . 
C2 C 0.4158(3) 0.2628(2) 0.3494(4) 0.0188(8) Uani 1 1 d . . . 
C3 C 0.4221(3) 0.1875(3) 0.4404(5) 0.0248(9) Uani 1 1 d . . . 
H5 H 0.4399 0.1924 0.5495 0.030 Uiso 1 1 calc R . . 
C4 C 0.4017(3) 0.1055(3) 0.3676(5) 0.0319(10) Uani 1 1 d . . . 
H6 H 0.4074 0.0551 0.4284 0.038 Uiso 1 1 calc R . . 
C5 C 0.3726(3) 0.0985(3) 0.2043(5) 0.0292(9) Uani 1 1 d . . . 
H7 H 0.3584 0.0433 0.1558 0.035 Uiso 1 1 calc R . . 
C6 C 0.3646(3) 0.1733(3) 0.1121(4) 0.0214(8) Uani 1 1 d . . . 
C7 C 0.3876(3) 0.2555(3) 0.1857(4) 0.0199(8) Uani 1 1 d . . . 
H3 H 0.3840 0.3056 0.1254 0.024 Uiso 1 1 calc R . . 
C8 C 0.3299(3) 0.1642(3) -0.0629(4) 0.0212(8) Uani 1 1 d . . . 
Cu2 Cu 0.2500 0.2500 -0.5000 0.0377(2) Uani 1 2 d S . . 
N1 N 0.3356(2) 0.2256(2) -0.1614(4) 0.0264(8) Uani 1 1 d . . . 
N2 N 0.2918(2) 0.1889(2) -0.3065(4) 0.0261(8) Uani 1 1 d . . . 
N3 N 0.2620(2) 0.1093(2) -0.2959(4) 0.0269(8) Uani 1 1 d . . . 
N4 N 0.2847(2) 0.0924(2) -0.1420(4) 0.0247(7) Uani 1 1 d . . . 
O3 O 0.4400(2) 0.35396(18) 0.5687(3) 0.0257(6) Uani 1 1 d . . . 
O4 O 0.45450(19) 0.41612(17) 0.3641(3) 0.0247(6) Uani 1 1 d . . . 
O1W O 0.3742(2) 0.59522(19) 0.2968(3) 0.0278(6) Uani 1 1 d . . . 
H1A H 0.3585 0.5686 0.3584 0.042 Uiso 1 1 d R . . 
H1B H 0.3657 0.6484 0.3010 0.042 Uiso 1 1 d R . . 
O2W O 0.34562(18) 0.48455(18) 0.0394(3) 0.0230(6) Uani 1 1 d . . . 
H2A H 0.3155 0.4664 0.0853 0.034 Uiso 1 1 d R . . 
H2B H 0.3188 0.5244 -0.0226 0.034 Uiso 1 1 d R . . 
Tb1 Tb 0.5000 0.530868(16) 0.2500 0.01649(9) Uani 1 2 d S . . 
 
loop_ 
 _atom_site_aniso_label 
 _atom_site_aniso_U_11 
 _atom_site_aniso_U_22 
 _atom_site_aniso_U_33 
 _atom_site_aniso_U_23 
 _atom_site_aniso_U_13 
 _atom_site_aniso_U_12 
C1 0.0206(18) 0.0174(19) 0.0177(18) -0.0014(15) 0.0056(15) -0.0002(15) 
C2 0.0206(18) 0.0173(19) 0.0184(19) -0.0023(15) 0.0083(15) -0.0021(15) 
C3 0.035(2) 0.021(2) 0.0174(19) -0.0015(16) 0.0102(17) -0.0033(18) 
C4 0.050(3) 0.016(2) 0.027(2) 0.0015(17) 0.014(2) -0.0040(19) 
C5 0.040(2) 0.0156(19) 0.028(2) -0.0049(17) 0.0110(19) -0.0049(18) 
C6 0.025(2) 0.021(2) 0.0169(19) -0.0033(16) 0.0075(16) -0.0013(16) 
C7 0.0222(19) 0.0177(19) 0.021(2) 0.0010(16) 0.0101(16) -0.0011(15) 
C8 0.0234(19) 0.020(2) 0.0188(19) -0.0025(16) 0.0080(16) -0.0012(16) 
Cu2 0.0508(5) 0.0373(5) 0.0211(4) 0.0039(3) 0.0116(4) -0.0015(4) 
N1 0.0314(19) 0.0261(18) 0.0197(17) -0.0036(14) 0.0090(15) -0.0057(15) 
N2 0.0301(18) 0.0269(19) 0.0204(17) -0.0019(15) 0.0098(15) -0.0028(15) 
N3 0.0336(19) 0.0222(18) 0.0221(17) -0.0037(14) 0.0093(15) -0.0034(15) 
N4 0.0331(19) 0.0200(17) 0.0172(16) -0.0049(14) 0.0070(14) -0.0038(15) 
O3 0.0397(16) 0.0209(14) 0.0165(13) -0.0032(11) 0.0120(12) -0.0020(12) 
O4 0.0329(15) 0.0164(14) 0.0230(14) 0.0005(12) 0.0103(12) -0.0038(12) 
O1W 0.0385(16) 0.0219(14) 0.0293(15) 0.0024(12) 0.0205(14) 0.0040(13) 
O2W 0.0255(14) 0.0229(15) 0.0192(13) 0.0031(11) 0.0083(11) 0.0002(12) 
Tb1 0.02365(15) 0.01195(14) 0.01309(14) 0.000 0.00714(10) 0.000 
 
_geom_special_details 
; 
 All esds (except the esd in the dihedral angle between two l.s. planes) 
 are estimated using the full covariance matrix.  The cell esds are taken 
 into account individually in the estimation of esds in distances, angles 
 and torsion angles; correlations between esds in cell parameters are only 
 used when they are defined by crystal symmetry.  An approximate (isotropic) 
 treatment of cell esds is used for estimating esds involving l.s. planes. 
; 
 
loop_ 
 _geom_bond_atom_site_label_1 
 _geom_bond_atom_site_label_2 
 _geom_bond_distance 
 _geom_bond_site_symmetry_2 
 _geom_bond_publ_flag 
C1 O4 1.258(5) . ? 
C1 O3 1.262(5) . ? 
C1 C2 1.501(5) . ? 
C2 C7 1.392(5) . ? 
C2 C3 1.397(5) . ? 
C3 C4 1.385(6) . ? 
C3 H5 0.9300 . ? 
C4 C5 1.386(6) . ? 
C4 H6 0.9300 . ? 
C5 C6 1.393(6) . ? 
C5 H7 0.9300 . ? 
C6 C7 1.393(5) . ? 
C6 C8 1.480(5) . ? 
C7 H3 0.9300 . ? 
C8 N4 1.339(5) . ? 
C8 N1 1.335(5) . ? 
Cu2 N2 1.871(3) . ? 
Cu2 N2 1.871(3) 7_554 ? 
N1 N2 1.343(5) . ? 
N2 N3 1.317(5) . ? 
N3 N4 1.339(5) . ? 
O3 Tb1 2.327(3) 5_666 ? 
O4 Tb1 2.311(3) . ? 
O1W Tb1 2.442(3) . ? 
O1W H1A 0.8222 . ? 
O1W H1B 0.8203 . ? 
O2W Tb1 2.508(3) . ? 
O2W H2A 0.8172 . ? 
O2W H2B 0.8176 . ? 
Tb1 O4 2.311(3) 2_655 ? 
Tb1 O3 2.327(3) 5_666 ? 
Tb1 O3 2.327(3) 6_565 ? 
Tb1 O1W 2.442(3) 2_655 ? 
Tb1 O2W 2.508(3) 2_655 ? 
 
loop_ 
 _geom_angle_atom_site_label_1 
 _geom_angle_atom_site_label_2 
 _geom_angle_atom_site_label_3 
 _geom_angle 
 _geom_angle_site_symmetry_1 
 _geom_angle_site_symmetry_3 
 _geom_angle_publ_flag 
O4 C1 O3 123.5(3) . . ? 
O4 C1 C2 120.1(3) . . ? 
O3 C1 C2 116.4(3) . . ? 
C7 C2 C3 120.1(3) . . ? 
C7 C2 C1 121.4(3) . . ? 
C3 C2 C1 118.5(3) . . ? 
C4 C3 C2 119.8(4) . . ? 
C4 C3 H5 120.1 . . ? 
C2 C3 H5 120.1 . . ? 
C5 C4 C3 120.0(4) . . ? 
C5 C4 H6 120.0 . . ? 
C3 C4 H6 120.0 . . ? 
C4 C5 C6 120.6(4) . . ? 
C4 C5 H7 119.7 . . ? 
C6 C5 H7 119.7 . . ? 
C5 C6 C7 119.5(3) . . ? 
C5 C6 C8 119.4(3) . . ? 
C7 C6 C8 121.1(3) . . ? 
C6 C7 C2 120.0(4) . . ? 
C6 C7 H3 120.0 . . ? 
C2 C7 H3 120.0 . . ? 
N4 C8 N1 111.7(3) . . ? 
N4 C8 C6 122.6(3) . . ? 
N1 C8 C6 125.7(3) . . ? 
N2 Cu2 N2 180.0(2) . 7_554 ? 
C8 N1 N2 103.8(3) . . ? 
N3 N2 N1 110.8(3) . . ? 
N3 N2 Cu2 122.2(3) . . ? 
N1 N2 Cu2 125.2(3) . . ? 
N2 N3 N4 108.3(3) . . ? 
C8 N4 N3 105.4(3) . . ? 
C1 O3 Tb1 125.5(2) . 5_666 ? 
C1 O4 Tb1 173.7(3) . . ? 
Tb1 O1W H1A 116.7 . . ? 
Tb1 O1W H1B 124.5 . . ? 
H1A O1W H1B 110.1 . . ? 
Tb1 O2W H2A 107.1 . . ? 
Tb1 O2W H2B 112.8 . . ? 
H2A O2W H2B 111.5 . . ? 
O4 Tb1 O4 82.38(14) 2_655 . ? 
O4 Tb1 O3 141.45(10) 2_655 5_666 ? 
O4 Tb1 O3 110.29(10) . 5_666 ? 
O4 Tb1 O3 110.29(10) 2_655 6_565 ? 
O4 Tb1 O3 141.45(10) . 6_565 ? 
O3 Tb1 O3 82.81(13) 5_666 6_565 ? 
O4 Tb1 O1W 76.80(10) 2_655 2_655 ? 
O4 Tb1 O1W 146.04(10) . 2_655 ? 
O3 Tb1 O1W 73.28(10) 5_666 2_655 ? 
O3 Tb1 O1W 71.85(10) 6_565 2_655 ? 
O4 Tb1 O1W 146.04(10) 2_655 . ? 
O4 Tb1 O1W 76.80(10) . . ? 
O3 Tb1 O1W 71.85(10) 5_666 . ? 
O3 Tb1 O1W 73.28(10) 6_565 . ? 
O1W Tb1 O1W 132.92(14) 2_655 . ? 
O4 Tb1 O2W 80.34(9) 2_655 . ? 
O4 Tb1 O2W 75.32(9) . . ? 
O3 Tb1 O2W 137.50(10) 5_666 . ? 
O3 Tb1 O2W 71.50(9) 6_565 . ? 
O1W Tb1 O2W 125.99(9) 2_655 . ? 
O1W Tb1 O2W 68.65(9) . . ? 
O4 Tb1 O2W 75.32(9) 2_655 2_655 ? 
O4 Tb1 O2W 80.34(9) . 2_655 ? 
O3 Tb1 O2W 71.50(9) 5_666 2_655 ? 
O3 Tb1 O2W 137.50(10) 6_565 2_655 ? 
O1W Tb1 O2W 68.65(9) 2_655 2_655 ? 
O1W Tb1 O2W 125.99(9) . 2_655 ? 
O2W Tb1 O2W 147.49(12) . 2_655 ? 
 
_diffrn_measured_fraction_theta_max    0.996 
_diffrn_reflns_theta_full              25.19 
_diffrn_measured_fraction_theta_full   0.996 
_refine_diff_density_max    0.770 
_refine_diff_density_min   -1.188 
_refine_diff_density_rms    0.102 


  
data_4
#====================================================================

# 1. SUBMISSION DETAILS

_publ_contact_author          # Name and address of author for correspondence
;
 Hong Deng
 School of Chemistry and Environment
 South China Nomal University 
 Guangzhou 510006
 P. R. China
;
_publ_contact_author_phone  '86 20 33381880'
_publ_contact_author_fax    '86 20 33381880'
_publ_contact_author_email  'dh@scnu.edu.cn'
_publ_requested_joiurnal    'Cryst. Growth Des.'
_publ_requested_coeditor_name ?
_publ_contact_letter
;
Dear Sir or Madam:
Please consider this CIF as supplmentary data for a manuscript
submitted to Cryst. Growth Des.

Deng Hong
;
#=================================================================

# 2. PROCESSING SUMMARY (IUCr Office Use Only)

_journal_date_recd_electronic     ?

_journal_date_to_coeditor         ?
_journal_date_from_coeditor       ?
_journal_date_accepted            ?

_journal_date_printers_first      ?
_journal_date_printers_final      ?
_journal_date_proofs_out          ?
_journal_date_proofs_in           ?

_journal_coeditor_name            ?
_journal_coeditor_code            ?
_journal_coeditor_notes
 ?

_journal_techeditor_code          ?
_journal_techeditor_notes
 ?

_journal_coden_ASTM               ?
_journal_name_full                ?
_journal_year                     ?
_journal_volume                   ?
_journal_issue                    ?
_journal_page_first               ?
_journal_page_last                ?

_journal_suppl_publ_number        ?
_journal_suppl_publ_pages         ?

#=======================================================

# 3. TITLE AND AUTHOR LIST

_publ_section_title
;
?
;

loop_
 _publ_author_name
 _publ_author_address
 'Hong Deng'
; School of Chemistry and Environment 
South China Normal University
Guangzhou 510006
P.R. China
;
 
#============================================================ 
 
_audit_creation_method            SHELXL-97 
_chemical_name_systematic 
; 
 ? 
; 
_chemical_name_common             ? 
_chemical_melting_point           ? 
_chemical_formula_moiety          'C16 H16 Cu Dy N8 O8' 
_chemical_formula_sum 
 'C16 H16 Cu Dy N8 O8' 
_chemical_formula_weight          674.42
 
loop_ 
 _atom_type_symbol 
 _atom_type_description 
 _atom_type_scat_dispersion_real 
 _atom_type_scat_dispersion_imag 
 _atom_type_scat_source 
 'C'  'C'   0.0033   0.0016 
 'International Tables Vol C Tables 4.2.6.8 and 6.1.1.4' 
 'H'  'H'   0.0000   0.0000 
 'International Tables Vol C Tables 4.2.6.8 and 6.1.1.4' 
 'Dy'  'Dy'  -0.1892   4.4098 
 'International Tables Vol C Tables 4.2.6.8 and 6.1.1.4' 
 'N'  'N'   0.0061   0.0033 
 'International Tables Vol C Tables 4.2.6.8 and 6.1.1.4' 
 'O'  'O'   0.0106   0.0060 
 'International Tables Vol C Tables 4.2.6.8 and 6.1.1.4' 
 'Cu'  'Cu'   0.3201   1.2651 
 'International Tables Vol C Tables 4.2.6.8 and 6.1.1.4' 
 
_symmetry_cell_setting            monoclinic 
_symmetry_space_group_name_H-M    'C 2/c' 
_symmetry_space_group_name_Hall   '-C 2yc'
 
loop_ 
 _symmetry_equiv_pos_as_xyz 
 'x, y, z' 
 '-x, y, -z+1/2' 
 'x+1/2, y+1/2, z' 
 '-x+1/2, y+1/2, -z+1/2' 
 '-x, -y, -z' 
 'x, -y, z-1/2' 
 '-x+1/2, -y+1/2, -z' 
 'x+1/2, -y+1/2, z-1/2' 
 
_cell_length_a                    16.0231(17) 
_cell_length_b                    15.1138(16) 
_cell_length_c                    9.2701(10) 
_cell_angle_alpha                 90.00 
_cell_angle_beta                  115.4840(10) 
_cell_angle_gamma                 90.00 
_cell_volume                      2026.5(4) 
_cell_formula_units_Z             4 
_cell_measurement_temperature     296(2) 
_cell_measurement_reflns_used     1832 
_cell_measurement_theta_min       1.95 
_cell_measurement_theta_max       25.20 
 
_exptl_crystal_description        block  
_exptl_crystal_colour             yellow 
_exptl_crystal_size_max           0.30 
_exptl_crystal_size_mid           0.28 
_exptl_crystal_size_min           0.25 
_exptl_crystal_density_meas       ? 
_exptl_crystal_density_diffrn     2.211 
_exptl_crystal_density_method     'not measured' 
_exptl_crystal_F_000              1308.0 
_exptl_absorpt_coefficient_mu     4.775 
_exptl_absorpt_correction_type    multi-scan 
_exptl_absorpt_correction_T_min   0.3792 
_exptl_absorpt_correction_T_max   0.4338 
_exptl_absorpt_process_details    'Apex2 (Bruker, 2005)' 
 
_exptl_special_details 
; 
 ? 
; 
 
_diffrn_ambient_temperature       296(2) 
_diffrn_radiation_wavelength      0.71073 
_diffrn_radiation_type            MoK\a 
_diffrn_radiation_source          'fine-focus sealed tube' 
_diffrn_radiation_monochromator   graphite 
_diffrn_measurement_device_type   'Bruker AXS SMART APEX CCD diffractometer'   
_diffrn_measurement_method        '\w scans' 
_diffrn_detector_area_resol_mean  ? 
_diffrn_standards_number          0 
_diffrn_standards_interval_count  ? 
_diffrn_standards_interval_time   ? 
_diffrn_standards_decay_%         ? 
_diffrn_reflns_number             5125 
_diffrn_reflns_av_R_equivalents   0.0207 
_diffrn_reflns_av_sigmaI/netI     0.0238 
_diffrn_reflns_limit_h_min        -17 
_diffrn_reflns_limit_h_max        19 
_diffrn_reflns_limit_k_min        -18 
_diffrn_reflns_limit_k_max        17 
_diffrn_reflns_limit_l_min        -11 
_diffrn_reflns_limit_l_max        7 
_diffrn_reflns_theta_min          1.95 
_diffrn_reflns_theta_max          25.20 
_reflns_number_total              1832 
_reflns_number_gt                 1744 
_reflns_threshold_expression      >2sigma(I) 
 
_computing_data_collection        'Apex2 (Bruker, 2005)'  
_computing_cell_refinement        'Apex2 (Bruker, 2005)'
_computing_data_reduction         'Apex2 (Bruker, 2005)' 
_computing_structure_solution     'SHELXL 6.12 (Bruker, 2000-2003)'
_computing_structure_refinement   'SHELXL 6.12' 
_computing_molecular_graphics     'SHELXL 6.12' 
_computing_publication_material   'SHELXL 6.12' 
 
_refine_special_details 
; 
 Refinement of F^2^ against ALL reflections.  The weighted R-factor wR and 
 goodness of fit S are based on F^2^, conventional R-factors R are based 
 on F, with F set to zero for negative F^2^. The threshold expression of 
 F^2^ > 2sigma(F^2^) is used only for calculating R-factors(gt) etc. and is 
 not relevant to the choice of reflections for refinement.  R-factors based 
 on F^2^ are statistically about twice as large as those based on F, and R- 
 factors based on ALL data will be even larger. 
; 
 
_refine_ls_structure_factor_coef  Fsqd  
_refine_ls_matrix_type            full 
_refine_ls_weighting_scheme       calc  
_refine_ls_weighting_details 
 'calc w=1/[\s^2^(Fo^2^)+(0.0226P)^2^+23.3996P] where P=(Fo^2^+2Fc^2^)/3' 
_atom_sites_solution_primary      direct 
_atom_sites_solution_secondary    difmap 
_atom_sites_solution_hydrogens    geom 
_refine_ls_hydrogen_treatment     constr  
_refine_ls_extinction_method      none 
_refine_ls_extinction_coef        ? 
_refine_ls_number_reflns          1832 
_refine_ls_number_parameters      156 
_refine_ls_number_restraints      0 
_refine_ls_R_factor_all           0.0249 
_refine_ls_R_factor_gt            0.0236 
_refine_ls_wR_factor_ref          0.0622 
_refine_ls_wR_factor_gt           0.0616 
_refine_ls_goodness_of_fit_ref    1.007 
_refine_ls_restrained_S_all       1.007 
_refine_ls_shift/su_max           0.009 
_refine_ls_shift/su_mean          0.002 
 
loop_ 
 _atom_site_label 
 _atom_site_type_symbol 
 _atom_site_fract_x 
 _atom_site_fract_y 
 _atom_site_fract_z 
 _atom_site_U_iso_or_equiv 
 _atom_site_adp_type 
 _atom_site_occupancy 
 _atom_site_symmetry_multiplicity 
 _atom_site_calc_flag 
 _atom_site_refinement_flags 
 _atom_site_disorder_assembly 
 _atom_site_disorder_group 
C1 C 0.1704(3) 0.3356(3) 0.5630(5) 0.0219(9) Uani 1 1 d . . . 
C2 C 0.1357(3) 0.3267(3) 0.3884(5) 0.0211(9) Uani 1 1 d . . . 
C3 C 0.1280(4) 0.4015(3) 0.2963(6) 0.0296(11) Uani 1 1 d . . . 
H4 H 0.1425 0.4567 0.3449 0.035 Uiso 1 1 calc R . . 
C4 C 0.0990(4) 0.3945(3) 0.1328(6) 0.0319(11) Uani 1 1 d . . . 
H5 H 0.0935 0.4450 0.0720 0.038 Uiso 1 1 calc R . . 
C5 C 0.0781(3) 0.3124(3) 0.0599(5) 0.0256(10) Uani 1 1 d . . . 
H6 H 0.0601 0.3075 -0.0494 0.031 Uiso 1 1 calc R . . 
C6 C 0.0840(3) 0.2367(3) 0.1508(5) 0.0191(9) Uani 1 1 d . . . 
C7 C 0.1122(3) 0.2443(3) 0.3144(5) 0.0191(9) Uani 1 1 d . . . 
H2 H 0.1156 0.1942 0.3748 0.023 Uiso 1 1 calc R . . 
C8 C 0.0611(3) 0.1488(3) 0.0681(5) 0.0187(9) Uani 1 1 d . . . 
Cu1 Cu 0.2500 0.2500 1.0000 0.0399(2) Uani 1 2 d S . . 
Dy1 Dy 0.0000 -0.030922(18) 0.2500 0.01668(10) Uani 1 2 d S . . 
N1 N 0.1644(3) 0.2745(3) 0.6611(4) 0.0261(9) Uani 1 1 d . . . 
N2 N 0.2082(3) 0.3114(3) 0.8068(4) 0.0277(9) Uani 1 1 d . . . 
N3 N 0.2384(3) 0.3908(3) 0.7960(5) 0.0279(9) Uani 1 1 d . . . 
N4 N 0.2158(3) 0.4077(3) 0.6427(4) 0.0259(8) Uani 1 1 d . . . 
O3 O 0.0452(2) 0.0834(2) 0.1366(4) 0.0246(7) Uani 1 1 d . . . 
O4 O 0.0592(2) 0.1453(2) -0.0686(4) 0.0260(7) Uani 1 1 d . . . 
O1W O -0.1259(2) -0.0948(2) 0.2956(4) 0.0285(7) Uani 1 1 d . . . 
H1A H -0.1374 -0.0684 0.3624 0.043 Uiso 1 1 d R . . 
H1B H -0.1317 -0.1484 0.3034 0.043 Uiso 1 1 d R . . 
O2W O -0.1537(2) 0.0159(2) 0.0397(4) 0.0229(7) Uani 1 1 d . . . 
H2A H -0.1837 0.0340 0.0859 0.034 Uiso 1 1 d R . . 
H2B H -0.1781 -0.0273 -0.0157 0.034 Uiso 1 1 d R . . 
 
loop_ 
 _atom_site_aniso_label 
 _atom_site_aniso_U_11 
 _atom_site_aniso_U_22 
 _atom_site_aniso_U_33 
 _atom_site_aniso_U_23 
 _atom_site_aniso_U_13 
 _atom_site_aniso_U_12 
C1 0.023(2) 0.021(2) 0.020(2) -0.0029(18) 0.0081(18) -0.0008(18) 
C2 0.023(2) 0.022(2) 0.018(2) -0.0057(18) 0.0088(18) -0.0011(18) 
C3 0.041(3) 0.017(2) 0.028(3) -0.0065(19) 0.012(2) -0.005(2) 
C4 0.050(3) 0.018(2) 0.025(2) 0.0024(19) 0.014(2) -0.004(2) 
C5 0.036(3) 0.022(2) 0.019(2) -0.0012(19) 0.0125(19) -0.004(2) 
C6 0.023(2) 0.017(2) 0.018(2) -0.0019(17) 0.0095(17) -0.0010(17) 
C7 0.020(2) 0.018(2) 0.021(2) -0.0007(17) 0.0101(18) -0.0017(17) 
C8 0.019(2) 0.018(2) 0.017(2) -0.0016(17) 0.0060(17) -0.0008(17) 
Cu1 0.0529(6) 0.0414(5) 0.0222(4) 0.0040(4) 0.0132(4) -0.0017(4) 
Dy1 0.02432(17) 0.01323(15) 0.01229(15) 0.000 0.00770(11) 0.000 
N1 0.031(2) 0.028(2) 0.0175(19) -0.0065(16) 0.0080(16) -0.0076(17) 
N2 0.032(2) 0.031(2) 0.0191(19) -0.0036(17) 0.0097(17) -0.0034(17) 
N3 0.034(2) 0.026(2) 0.021(2) -0.0047(16) 0.0090(17) -0.0034(17) 
N4 0.034(2) 0.022(2) 0.0177(19) -0.0048(16) 0.0075(16) -0.0043(17) 
O3 0.0334(18) 0.0165(16) 0.0224(16) 0.0002(13) 0.0105(14) -0.0043(13) 
O4 0.0414(19) 0.0226(17) 0.0161(15) -0.0041(13) 0.0142(14) -0.0018(14) 
O1W 0.041(2) 0.0236(17) 0.0273(17) -0.0022(14) 0.0208(15) -0.0037(15) 
O2W 0.0268(16) 0.0224(17) 0.0184(15) -0.0039(12) 0.0087(13) 0.0002(13) 
 
_geom_special_details 
; 
 All esds (except the esd in the dihedral angle between two l.s. planes) 
 are estimated using the full covariance matrix.  The cell esds are taken 
 into account individually in the estimation of esds in distances, angles 
 and torsion angles; correlations between esds in cell parameters are only 
 used when they are defined by crystal symmetry.  An approximate (isotropic) 
 treatment of cell esds is used for estimating esds involving l.s. planes. 
; 
 
loop_ 
 _geom_bond_atom_site_label_1 
 _geom_bond_atom_site_label_2 
 _geom_bond_distance 
 _geom_bond_site_symmetry_2 
 _geom_bond_publ_flag 
C1 N1 1.329(6) . ? 
C1 N4 1.341(6) . ? 
C1 C2 1.474(6) . ? 
C2 C7 1.393(6) . ? 
C2 C3 1.390(7) . ? 
C3 C4 1.385(7) . ? 
C3 H4 0.9300 . ? 
C4 C5 1.383(7) . ? 
C4 H5 0.9300 . ? 
C5 C6 1.400(6) . ? 
C5 H6 0.9300 . ? 
C6 C7 1.388(6) . ? 
C6 C8 1.498(6) . ? 
C7 H2 0.9300 . ? 
C8 O4 1.256(5) . ? 
C8 O3 1.258(5) . ? 
Cu1 N2 1.867(4) . ? 
Cu1 N2 1.867(4) 7_557 ? 
Dy1 O3 2.296(3) 2 ? 
Dy1 O3 2.296(3) . ? 
Dy1 O4 2.312(3) 5 ? 
Dy1 O4 2.312(3) 6_556 ? 
Dy1 O1W 2.431(3) 2 ? 
Dy1 O1W 2.431(3) . ? 
Dy1 O2W 2.497(3) 2 ? 
Dy1 O2W 2.497(3) . ? 
N1 N2 1.346(5) . ? 
N2 N3 1.314(6) . ? 
N3 N4 1.332(5) . ? 
O4 Dy1 2.312(3) 5 ? 
O1W H1A 0.8222 . ? 
O1W H1B 0.8216 . ? 
O2W H2A 0.8176 . ? 
O2W H2B 0.8184 . ? 
 
loop_ 
 _geom_angle_atom_site_label_1 
 _geom_angle_atom_site_label_2 
 _geom_angle_atom_site_label_3 
 _geom_angle 
 _geom_angle_site_symmetry_1 
 _geom_angle_site_symmetry_3 
 _geom_angle_publ_flag 
N1 C1 N4 111.7(4) . . ? 
N1 C1 C2 125.7(4) . . ? 
N4 C1 C2 122.5(4) . . ? 
C7 C2 C3 119.4(4) . . ? 
C7 C2 C1 121.1(4) . . ? 
C3 C2 C1 119.5(4) . . ? 
C4 C3 C2 120.7(4) . . ? 
C4 C3 H4 119.7 . . ? 
C2 C3 H4 119.7 . . ? 
C5 C4 C3 120.0(4) . . ? 
C5 C4 H5 120.0 . . ? 
C3 C4 H5 120.0 . . ? 
C4 C5 C6 120.0(4) . . ? 
C4 C5 H6 120.0 . . ? 
C6 C5 H6 120.0 . . ? 
C7 C6 C5 119.7(4) . . ? 
C7 C6 C8 121.7(4) . . ? 
C5 C6 C8 118.6(4) . . ? 
C6 C7 C2 120.3(4) . . ? 
C6 C7 H2 119.9 . . ? 
C2 C7 H2 119.9 . . ? 
O4 C8 O3 123.7(4) . . ? 
O4 C8 C6 116.5(4) . . ? 
O3 C8 C6 119.8(4) . . ? 
N2 Cu1 N2 180.000(1) . 7_557 ? 
O3 Dy1 O3 82.35(16) 2 . ? 
O3 Dy1 O4 141.68(11) 2 5 ? 
O3 Dy1 O4 109.97(11) . 5 ? 
O3 Dy1 O4 109.97(11) 2 6_556 ? 
O3 Dy1 O4 141.68(11) . 6_556 ? 
O4 Dy1 O4 83.16(15) 5 6_556 ? 
O3 Dy1 O1W 145.79(11) 2 2 ? 
O3 Dy1 O1W 76.74(11) . 2 ? 
O4 Dy1 O1W 71.83(11) 5 2 ? 
O4 Dy1 O1W 73.62(11) 6_556 2 ? 
O3 Dy1 O1W 76.74(11) 2 . ? 
O3 Dy1 O1W 145.79(11) . . ? 
O4 Dy1 O1W 73.62(11) 5 . ? 
O4 Dy1 O1W 71.83(11) 6_556 . ? 
O1W Dy1 O1W 133.22(16) 2 . ? 
O3 Dy1 O2W 80.11(11) 2 2 ? 
O3 Dy1 O2W 75.22(10) . 2 ? 
O4 Dy1 O2W 137.58(11) 5 2 ? 
O4 Dy1 O2W 71.70(11) 6_556 2 ? 
O1W Dy1 O2W 68.61(11) 2 2 ? 
O1W Dy1 O2W 126.15(10) . 2 ? 
O3 Dy1 O2W 75.22(10) 2 . ? 
O3 Dy1 O2W 80.11(11) . . ? 
O4 Dy1 O2W 71.70(11) 5 . ? 
O4 Dy1 O2W 137.58(11) 6_556 . ? 
O1W Dy1 O2W 126.15(10) 2 . ? 
O1W Dy1 O2W 68.61(11) . . ? 
O2W Dy1 O2W 147.06(14) 2 . ? 
C1 N1 N2 103.8(4) . . ? 
N3 N2 N1 110.6(4) . . ? 
N3 N2 Cu1 122.4(3) . . ? 
N1 N2 Cu1 125.0(3) . . ? 
N4 N3 N2 108.4(4) . . ? 
N3 N4 C1 105.4(4) . . ? 
C8 O3 Dy1 173.9(3) . . ? 
C8 O4 Dy1 126.1(3) . 5 ? 
Dy1 O1W H1A 114.2 . . ? 
Dy1 O1W H1B 122.7 . . ? 
H1A O1W H1B 110.0 . . ? 
Dy1 O2W H2A 106.9 . . ? 
Dy1 O2W H2B 108.0 . . ? 
H2A O2W H2B 111.4 . . ? 
 
_diffrn_measured_fraction_theta_max    0.999 
_diffrn_reflns_theta_full              25.20 
_diffrn_measured_fraction_theta_full   0.999 
_refine_diff_density_max    1.016 
_refine_diff_density_min   -1.463 
_refine_diff_density_rms    0.123 
